# Supplementary material for: A Satellite-Based Spatio-Temporal Machine Learning Model to Reconstruct Daily PM2.5 Concentrations across Great Britain
Source: PubMed Central journal article supplement (PMC7116547; doi:10.3390/rs12223803), 2020-11-20
Supplement: EMS104896-supplement-Appendix.pdf [file EMS104896-supplement-Appendix.pdf]

SUPPLEMENTARY MATERIAL

## A satellite-based spatio-temporal machine learning model to reconstruct daily PM<sub>2.5</sub> concentrations across Great Britain

### Stage-1: increasing PM<sub>2.5</sub> measurements using co-located PM<sub>10</sub> monitors

Table S1. Stage-1 results for 10-Fold CV spatial and temporal domains.

| Stage-1     | Spatial |       |        |       | Temporal |       |        |       |
|-------------|---------|-------|--------|-------|----------|-------|--------|-------|
|             | R2      | RMSE  | Inter. | Slope | R2       | RMSE  | Inter. | Slope |
| 2008        | 0.489   | 2.329 | 3.818  | 0.660 | 0.775    | 3.914 | 0.000  | 0.955 |
| 2009        | 0.475   | 2.433 | 4.492  | 0.630 | 0.865    | 2.978 | 0.000  | 1.008 |
| 2010        | 0.728   | 2.007 | 0.814  | 0.928 | 0.872    | 2.831 | 0.000  | 0.996 |
| 2011        | 0.784   | 1.839 | 0.864  | 0.932 | 0.920    | 2.913 | 0.000  | 1.006 |
| 2012        | 0.692   | 1.959 | 1.817  | 0.848 | 0.920    | 2.563 | 0.000  | 1.007 |
| 2013        | 0.606   | 2.774 | 2.757  | 0.780 | 0.887    | 2.876 | 0.000  | 1.003 |
| 2014        | 0.691   | 1.709 | 1.598  | 0.864 | 0.917    | 2.472 | 0.000  | 1.011 |
| 2015        | 0.698   | 1.496 | 1.260  | 0.858 | 0.899    | 2.200 | 0.000  | 1.003 |
| 2016        | 0.794   | 1.517 | 0.146  | 0.977 | 0.905    | 2.190 | 0.000  | 1.000 |
| 2017        | 0.824   | 1.433 | 0.590  | 0.921 | 0.912    | 2.012 | 0.000  | 1.001 |
| 2018        | 0.844   | 1.155 | 0.521  | 0.932 | 0.897    | 1.915 | 0.000  | 1.009 |
| <b>Mean</b> | 0.693   | 1.877 | 1.698  | 0.848 | 0.888    | 2.624 | 0.000  | 1.000 |

## Stage-2: imputing missing satellite-AOD from CAMS modelled-AOD

The Pearson correlation results displayed in Table A2 show a strong correlation across the years between satellite-AOD  $0.47\mu\text{m}$  and the five CAMS modelled-AOD wavelengths. Time 12:00 has been selected to demonstrate the correlation since it is the closest time from both sun-synchronous satellites with near-polar circular orbit to cross the UK territory during daylight from south to north (Aqua) and from north to south (Terra). Table A3 displays the variable importance results from the  $0.47\mu\text{m}$ -RF models measure for the first (2008), middle (2013), and last (2018) years.

Table S2. Pearson correlation between Satellite-AOD  $0.47\mu\text{m}$  and five CAMS modelled-AOD wavelengths at the time 12:00.  $0.47\mu\text{m}$ ,  $0.55\mu\text{m}$ ,  $0.67\mu\text{m}$ ,  $0.865\mu\text{m}$ , and  $1.24\mu\text{m}$

| Stage-2 | CAMS modelled-AOD |                   |                   |                    |                   |
|---------|-------------------|-------------------|-------------------|--------------------|-------------------|
|         | $0.47\mu\text{m}$ | $0.55\mu\text{m}$ | $0.67\mu\text{m}$ | $0.865\mu\text{m}$ | $1.24\mu\text{m}$ |
| 2008    | 0.745             | 0.734             | 0.705             | 0.631              | 0.439             |
| 2009    | 0.737             | 0.730             | 0.711             | 0.653              | 0.491             |
| 2010    | 0.706             | 0.706             | 0.703             | 0.681              | 0.599             |
| 2011    | 0.849             | 0.843             | 0.825             | 0.769              | 0.614             |
| 2012    | 0.775             | 0.773             | 0.762             | 0.730              | 0.634             |
| 2013    | 0.814             | 0.808             | 0.793             | 0.750              | 0.619             |
| 2014    | 0.635             | 0.598             | 0.529             | 0.408              | 0.227             |
| 2015    | 0.660             | 0.648             | 0.616             | 0.532              | 0.353             |
| 2016    | 0.761             | 0.758             | 0.747             | 0.707              | 0.571             |
| 2017    | 0.638             | 0.635             | 0.624             | 0.587              | 0.484             |
| 2018    | 0.711             | 0.712             | 0.705             | 0.675              | 0.573             |

Table S3. Relative importance (%) of the predictors in Stage-2.

| Stage 2 –Predictors                        | 2008  | 2013  | 2018  |
|--------------------------------------------|-------|-------|-------|
| CAMS modelled-AOD $0.550\mu\text{m}$ 12:00 | 17.18 | 26.61 | 25.30 |
| CAMS modelled-AOD $0.469\mu\text{m}$ 12:00 | 27.92 | 25.84 | 16.74 |
| CAMS modelled-AOD $0.670\mu\text{m}$ 12:00 | 4.93  | 8.95  | 10.66 |
| Latitude                                   | 5.50  | 3.35  | 6.70  |
| Longitude                                  | 5.95  | 3.93  | 6.65  |
| Day of the year                            | 5.15  | 4.59  | 4.80  |
| CAMS modelled-AOD $0.865\mu\text{m}$ 12:00 | 1.24  | 1.34  | 2.04  |
| CAMS modelled-AOD $1.240\mu\text{m}$ 12:00 | 1.39  | 1.42  | 1.63  |
| CAMS modelled-AOD $0.469\mu\text{m}$ 15:00 | 5.64  | 2.63  | 1.56  |
| CAMS modelled-AOD $1.240\mu\text{m}$ 9:00  | 1.01  | 1.02  | 1.23  |

Note: The top 10 predictors in the RF's importance ranking list are displayed for 2008, 2013, and 2018.

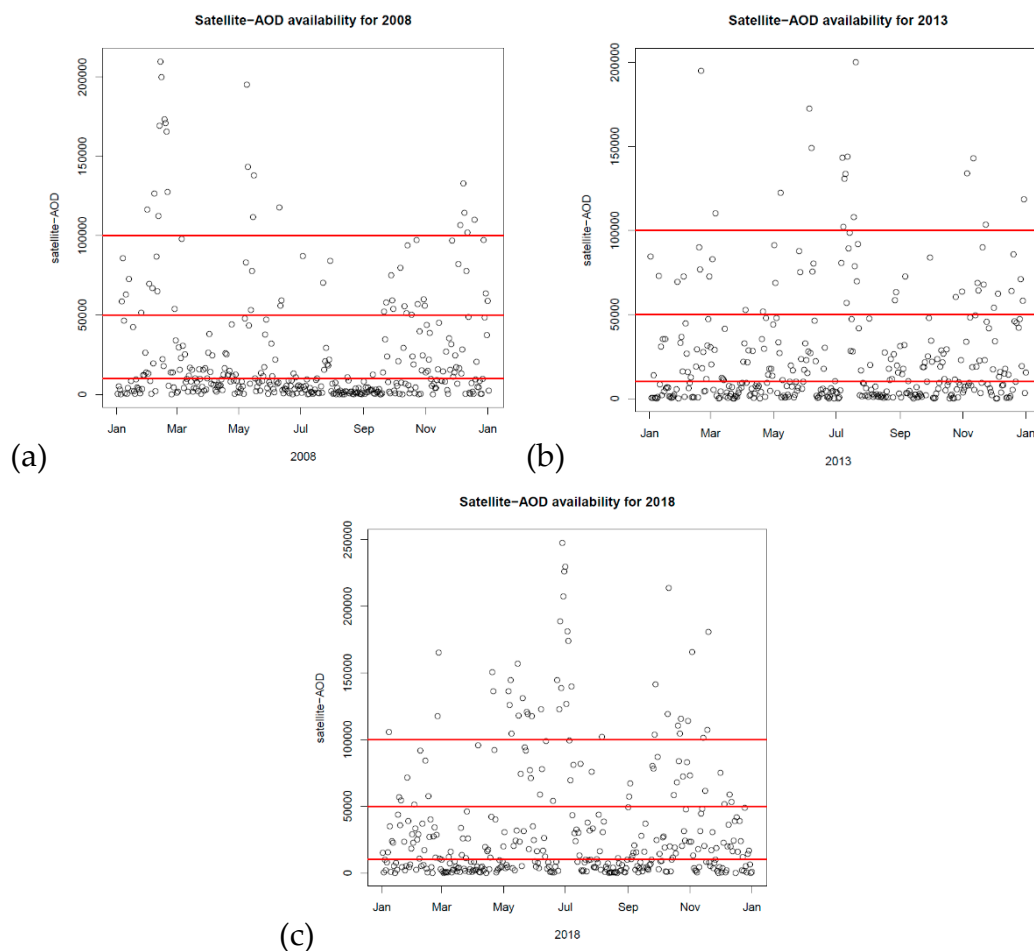

Figure S1. Number of 1 km Great Britain Grid cells with daily satellite-AOD available for (a) 2008, (b) 2013, and (c) 2018. The horizontal red lines represent the thresholds: 10,000, 50,000, and 100,000 1 km grid cells. These data refer to satellite-AOD available after the filtering process to remove bad retrievals.

### Stage-3: estimating PM<sub>2.5</sub> concentrations using spatial and spatio-temporal variables

Table S4. Predicted-PM<sub>2.5</sub> concentrations obtained from Stage-3 RF models by season were regressed against Stage-1 measured/predicted-PM<sub>2.5</sub> concentrations in a linear regression model. The CV-R<sup>2</sup> described in three different patterns (overall, spatial, and temporal), RMSE (a measure of the model error,  $\mu\text{g}/\text{m}^3$ ), intercept ( $\mu\text{g}/\text{m}^3$ ), and slope ( $\mu\text{g}/\text{m}^3$ ). In Great Britain, the season is composed of the following months: (i) Winter: December, January, and February, (ii) Spring: March, April, and May, (iii) Summer: June, July, and August, and (iv) Autumn: September, October, and November.

| Stage-3<br>By Season | Overall |       | Spatial |       | Temporal |       |
|----------------------|---------|-------|---------|-------|----------|-------|
|                      | R2      | RMSE  | R2      | RMSE  | R2       | RMSE  |
| Winter               | 0.818   | 4.022 | 0.749   | 2.029 | 0.832    | 3.533 |
| Spring               | 0.796   | 3.797 | 0.704   | 1.929 | 0.815    | 3.286 |
| Summer               | 0.653   | 2.749 | 0.727   | 1.648 | 0.602    | 2.249 |
| Autumn               | 0.721   | 3.690 | 0.704   | 1.983 | 0.728    | 3.163 |

**Stage-4: reconstructing PM2.5 time-series at 1 km grid**Table S5. Distribution of annual averages PM<sub>2.5</sub> concentrations for all years.

| Year | Min   | 25th<br>Percentile | Mean   | Median | 75th<br>Percentile | Max    | Standard<br>Deviation |
|------|-------|--------------------|--------|--------|--------------------|--------|-----------------------|
| 2008 | 4.270 | 7.160              | 9.407  | 9.687  | 11.366             | 23.053 | 2.550                 |
| 2009 | 4.200 | 6.281              | 8.863  | 7.922  | 11.381             | 20.991 | 2.920                 |
| 2010 | 4.294 | 6.131              | 9.229  | 7.811  | 13.065             | 20.649 | 3.533                 |
| 2011 | 3.996 | 6.090              | 9.789  | 8.389  | 14.119             | 23.709 | 4.223                 |
| 2012 | 4.117 | 6.044              | 9.285  | 8.064  | 13.150             | 24.527 | 3.622                 |
| 2013 | 4.901 | 6.875              | 10.172 | 9.668  | 13.708             | 21.554 | 3.473                 |
| 2014 | 5.779 | 7.757              | 10.056 | 9.941  | 12.235             | 21.638 | 2.367                 |
| 2015 | 3.488 | 4.804              | 7.723  | 8.219  | 10.036             | 21.241 | 2.705                 |
| 2016 | 3.300 | 4.583              | 7.304  | 6.770  | 9.605              | 19.048 | 2.859                 |
| 2017 | 3.932 | 5.491              | 7.371  | 6.992  | 8.878              | 17.566 | 2.039                 |
| 2018 | 4.142 | 6.003              | 8.051  | 7.823  | 9.692              | 18.085 | 2.061                 |
